# Supplementary material for: Intrinsically disordered linkers control tethered kinases via effective concentration
Source: bioRxiv or medRxiv preprint supplement (doi:10.1101/2020.04.04.023713), 2020-04-04
Supplement: Supplementary file [file media-1.pdf]

Supplementary Information for:

# **Intrinsically disordered linkers control tethered kinases via effective concentration**

Mateusz Dyla<sup>1,2</sup> and Magnus Kjaergaard<sup>1-4\*</sup>

<sup>1</sup> Department of Molecular Biology and Genetics, Aarhus University

<sup>2</sup> The Danish Research Institute for Translational Neuroscience (DANDRITE), Nordic EMBL Partnership for Molecular Medicine

<sup>3</sup> Center for Proteins in Memory - PROMEMO, Danish National Research Foundation

<sup>4</sup> Aarhus Institute of Advanced Studies, AIAS, Aarhus University

\* Corresponding author: [magnus@mbg.au.dk](mailto:magnus@mbg.au.dk)

## Protein sequences

### Color coding:

- 6xHis-tag
- Thrombin cleavage sequence, // marks the cleavage site
- MBD2 dimerization domain
- p66 $\alpha$  dimerization domain
- GCTAGC (AS) - NheI restriction site
- (GS)<sub>n</sub> - variable-length GS linker; n = 1, 10, 30 or 60
- GGTACC (GT) - KpnI restriction site
- PKA substrate motif, catalytic Ser shown in **bold**

### 1. PKAc

MGSSHHHHHHSSGLVPR//GSHMGNAAAAKKGSEQESVKEFLAKAKEDFLKKWETPSQNTAQLDQFDRIKTLGTGSFGRVMLVKHKESGNHYAMKILDQKQVVKLKQIEHTLNEKRILQAVNFPFLVKLEFSFKDNSNLYMVMEYVAGGEMFSLRRIGRFSEPHARFYAAQIVLTFEYLHSLDLIYRDLKPENLLIDQQGYIQVTDFGFAKRVKGRWTLCGTPEYLAP EIILSKGYNKAVDWWALGVLIYEMAAGYPPFFADQPIQIYKIVSGKVRFP SHFSSDLKDLLRNLLQVDLTKRFGNLKNGVNDIKNHKWFATTDWIAIYQRKVEAPFIPKFKGPGDTSNFDDYEEEEIRVSINEKCGKEFTEF

### 2. MBD2-(GS)<sub>n</sub>-PKAc

MGSSHHHHHHSSGLVPR//GSHMVTDEDIRKQEERAQQVRKKLEELMADAS(GS)<sub>n</sub>GTGNAAA AKKGSEQESVKEFLAKAKEDFLKKWETPSQNTAQLDQFDRIKTLGTGSFGRVMLVKHKESGNHYAMKILDQKQVVKLKQIEHTLNEKRILQAVNFPFLVKLEFSFKDNSNLYMVMEYVAGGEMFSLRRIGRFSEPHARFYAAQIVLTFEYLHSLDLIYRDLKPENLLIDQQGYIQVTDFGFAKRVKGRWTLCGTPEYLAP EIILSKGYNKAVDWWALGVLIYEMAAGYPPFFADQPIQIYKIVSGKVRFP SHFSSDLKDLLRNLLQVDLTKRFGNLKNGVNDIKNHKWFATTDWIAIYQRKVEAPFIPKFKGPGDTSNFDDYEEEEIRVSINEKCGKEFTEF

### 3. p66 $\alpha$ -(GS)<sub>n</sub>-WT substrate

MGSSHHHHHHSSGLVPR//GSHMTSPEERERMIKQLKEELRLEEAKLVLLKKLRQSQIQKEATAQKAS(GS)<sub>n</sub>GTPGSGSGSGSLRRASLGGGGGY

### 4. p66 $\alpha$ -(GS)<sub>n</sub>-R-2K substrate

MGSSHHHHHHSSGLVPR//GSHMTSPEERERMIKQLKEELRLEEAKLVLLKKLRQSQIQKEATAQKAS(GS)<sub>n</sub>GTPGSGSGSGSLRKASLGGGGGY

### 5. p66 $\alpha$ -(GS)<sub>n</sub>-R-3K substrate

MGSSHHHHHHSSGLVPR//GSHMTSPEERERMIKQLKEELRLEEAKLVLLKKLRQSQIQKEATAQKAS(GS)<sub>n</sub>GTPGSGSGSGSLKRASLGGGGGY

## Supplementary figures

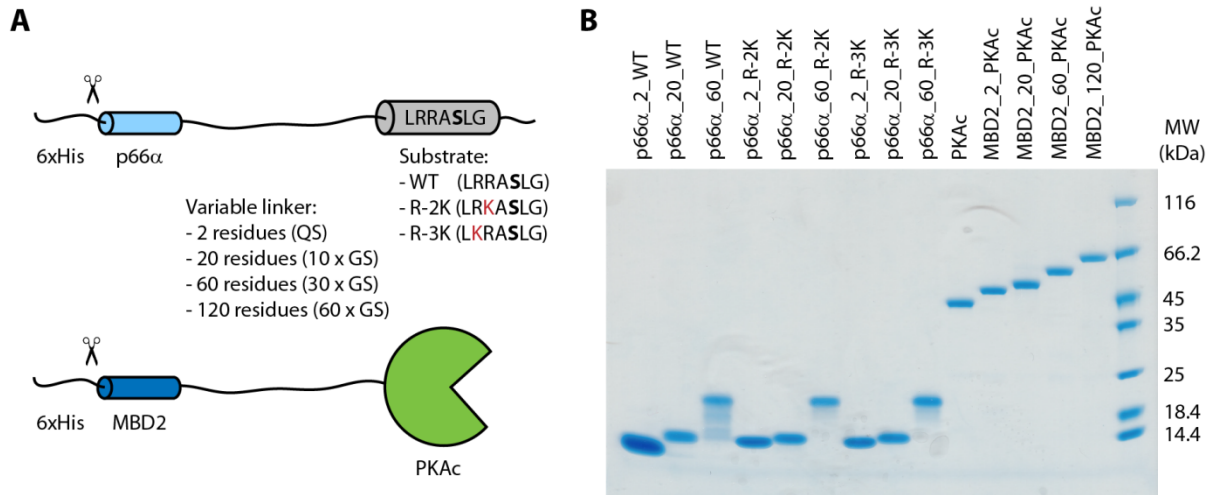

**Fig. S1: Protein variants used in this study.** (A) Schematic representation of the protein variants used to form the tethered kinase substrate complex. Both constructs contain variable GS-linker. (B) SDS-PAGE gel of purified proteins. The substrate with a 120 residue GS linker could not be purified to sufficient purity.

Next four pages:

**Fig. S2: Raw data from quench-flow experiments.**

# PKA & S WT

Linker length:

1 mM ATP+ 5  $\mu$ M PKA & S

0.1 mM ATP+ 0.5  $\mu$ M PKA & S

20

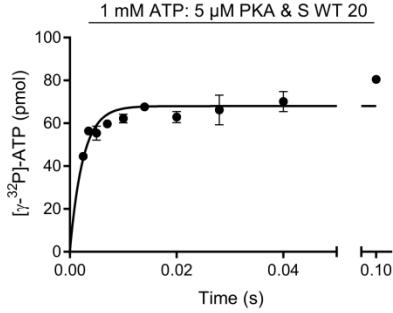

| Best-fit values |          |
|-----------------|----------|
| Y0              | = 0.000  |
| Plateau         | 68.00    |
| K               | 406.6    |
| Tau             | 0.002460 |
| Half-time       | 0.001705 |
| Span            | = 68.00  |
| Std. Error      |          |
| Plateau         | 1.718    |
| K               | 50.41    |

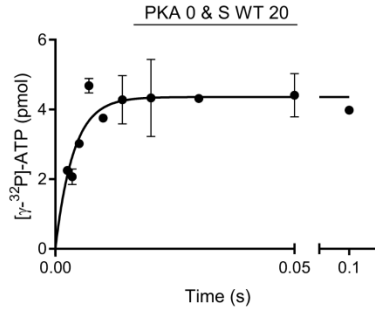

| Best-fit values |          |
|-----------------|----------|
| Y0              | = 0.000  |
| Plateau         | 4.355    |
| K               | 263.9    |
| Tau             | 0.003790 |
| Half-time       | 0.002627 |
| Span            | = 4.355  |
| Std. Error      |          |
| Plateau         | 0.1957   |
| K               | 47.04    |

40

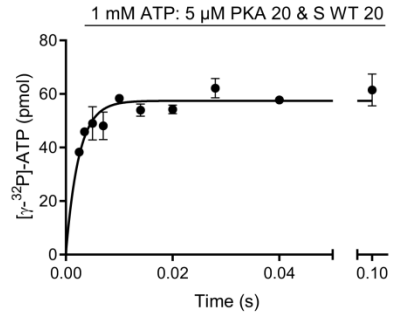

| Best-fit values |          |
|-----------------|----------|
| Y0              | = 0.000  |
| Plateau         | 57.44    |
| K               | 411.2    |
| Tau             | 0.002432 |
| Half-time       | 0.001686 |
| Span            | = 57.44  |
| Std. Error      |          |
| Plateau         | 1.356    |
| K               | 46.58    |

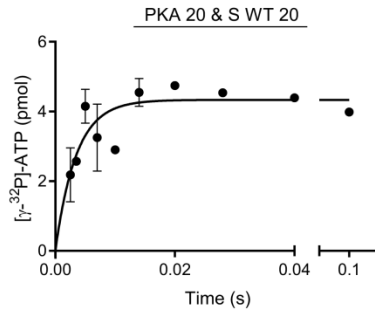

| Best-fit values |          |
|-----------------|----------|
| Y0              | = 0.000  |
| Plateau         | 4.331    |
| K               | 287.6    |
| Tau             | 0.003477 |
| Half-time       | 0.002410 |
| Span            | = 4.331  |
| Std. Error      |          |
| Plateau         | 0.2459   |
| K               | 58.18    |

60

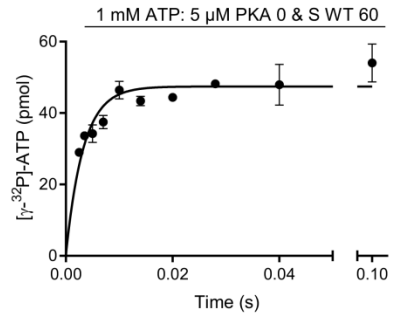

| Best-fit values |          |
|-----------------|----------|
| Y0              | = 0.000  |
| Plateau         | 47.44    |
| K               | 306.7    |
| Tau             | 0.003260 |
| Half-time       | 0.002260 |
| Span            | = 47.44  |
| Std. Error      |          |
| Plateau         | 1.275    |
| K               | 34.45    |

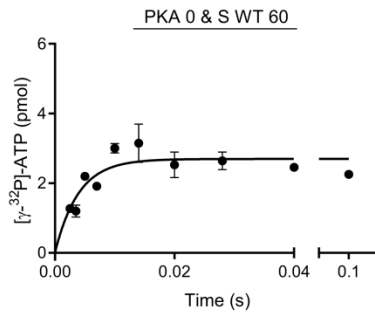

| Best-fit values |          |
|-----------------|----------|
| Y0              | = 0.000  |
| Plateau         | 2.694    |
| K               | 254.7    |
| Tau             | 0.003927 |
| Half-time       | 0.002722 |
| Span            | = 2.694  |
| Std. Error      |          |
| Plateau         | 0.1361   |
| K               | 47.63    |

80

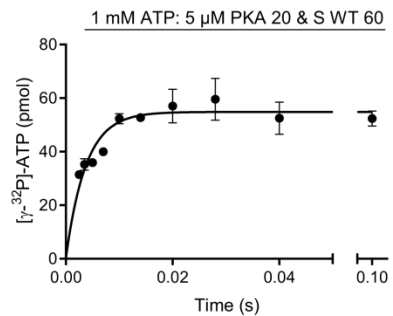

| Best-fit values |          |
|-----------------|----------|
| Y0              | = 0.000  |
| Plateau         | 54.85    |
| K               | 267.7    |
| Tau             | 0.003735 |
| Half-time       | 0.002589 |
| Span            | = 54.85  |
| Std. Error      |          |
| Plateau         | 1.508    |
| K               | 29.40    |

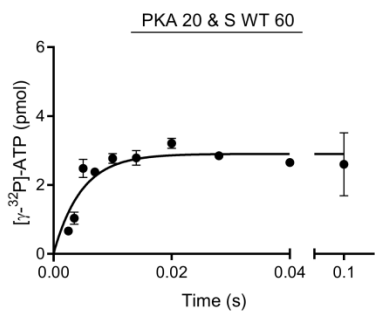

| Best-fit values |          |
|-----------------|----------|
| Y0              | = 0.000  |
| Plateau         | 2.900    |
| K               | 212.2    |
| Tau             | 0.004713 |
| Half-time       | 0.003267 |
| Span            | = 2.900  |
| Std. Error      |          |
| Plateau         | 0.1629   |
| K               | 40.88    |

120

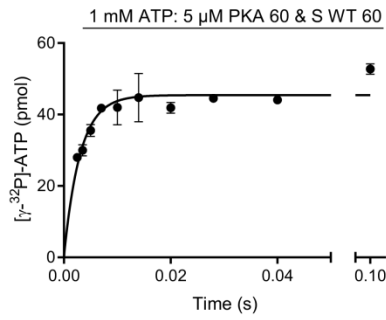

| Best-fit values |          |
|-----------------|----------|
| Y0              | = 0.000  |
| Plateau         | 45.42    |
| K               | 330.7    |
| Tau             | 0.003024 |
| Half-time       | 0.002096 |
| Span            | = 45.42  |
| Std. Error      |          |
| Plateau         | 1.109    |
| K               | 35.09    |

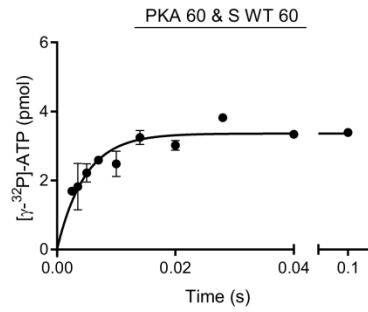

| Best-fit values |          |
|-----------------|----------|
| Y0              | = 0.000  |
| Plateau         | 3.357    |
| K               | 211.7    |
| Tau             | 0.004724 |
| Half-time       | 0.003275 |
| Span            | = 3.357  |
| Std. Error      |          |
| Plateau         | 0.1144   |
| K               | 25.64    |

180

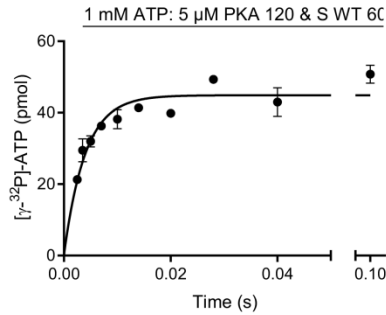

| Best-fit values |          |
|-----------------|----------|
| Y0              | = 0.000  |
| Plateau         | 44.89    |
| K               | 250.9    |
| Tau             | 0.003986 |
| Half-time       | 0.002763 |
| Span            | = 44.89  |
| Std. Error      |          |
| Plateau         | 1.229    |
| K               | 26.15    |

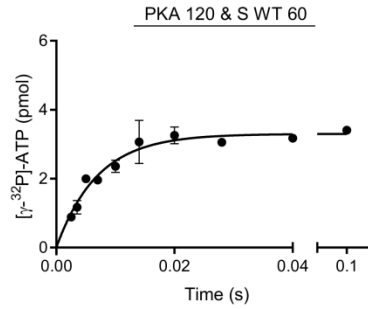

| Best-fit values |          |
|-----------------|----------|
| Y0              | = 0.000  |
| Plateau         | 3.296    |
| K               | 143.5    |
| Tau             | 0.006968 |
| Half-time       | 0.004830 |
| Span            | = 3.296  |
| Std. Error      |          |
| Plateau         | 0.09910  |
| K               | 13.37    |

not linked

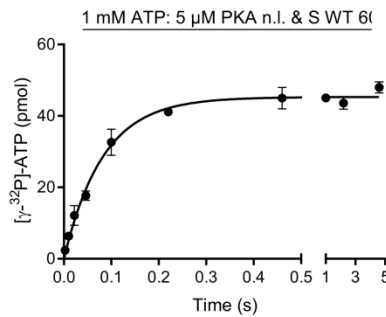

| Best-fit values |         |
|-----------------|---------|
| Y0              | = 0.000 |
| Plateau         | 45.27   |
| K               | 12.16   |
| Tau             | 0.08226 |
| Half-time       | 0.05702 |
| Span            | = 45.27 |
| Std. Error      |         |
| Plateau         | 0.7081  |
| K               | 0.7949  |

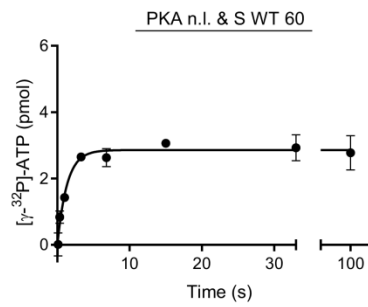

| Best-fit values |         |
|-----------------|---------|
| Y0              | = 0.000 |
| Plateau         | 2.857   |
| K               | 0.7487  |
| Tau             | 1.336   |
| Half-time       | 0.9259  |
| Span            | = 2.857 |
| Std. Error      |         |
| Plateau         | 0.09481 |
| K               | 0.1225  |

Linker length:

PKA & S R-2K

PKA & S R-3K

0.1 mM ATP+ 0.5 μM PKA & S

0.1 mM ATP+ 0.5 μM PKA & S

20

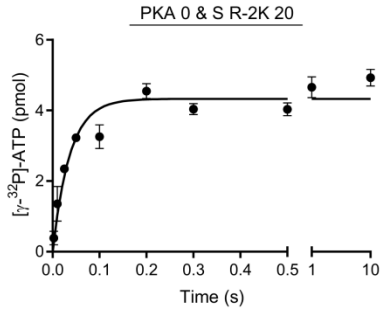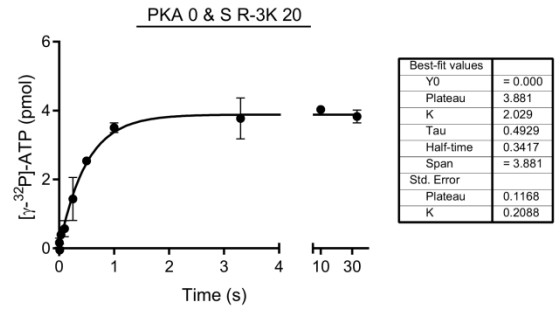

40

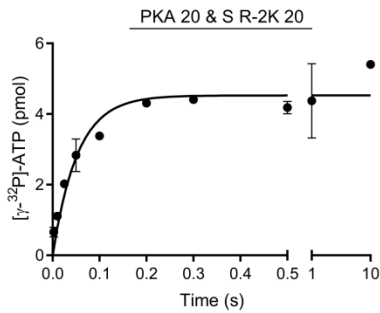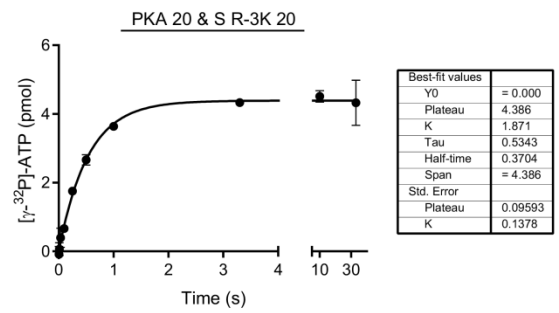

60

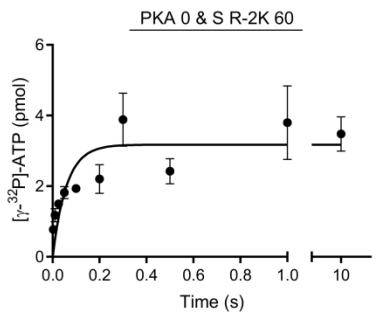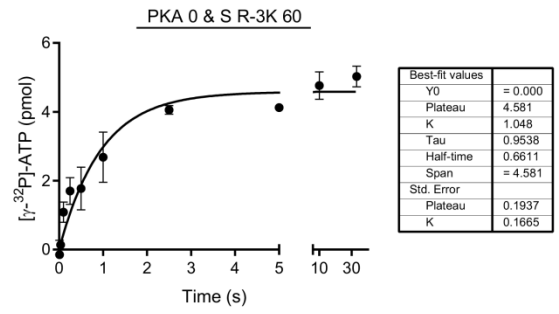

80

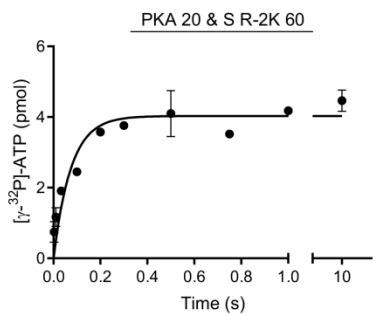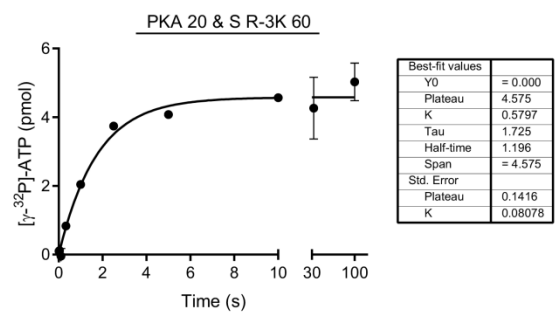

120

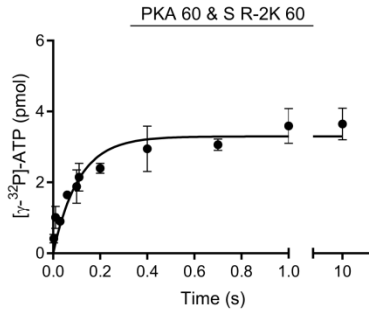

| Best-fit values |         |
|-----------------|---------|
| Y0              | = 0.000 |
| Plateau         | 3.297   |
| K               | 9.214   |
| Tau             | 0.1085  |
| Half-time       | 0.07522 |
| Span            | = 3.297 |
| Std. Error      |         |
| Plateau         | 0.1629  |
| K               | 1.538   |

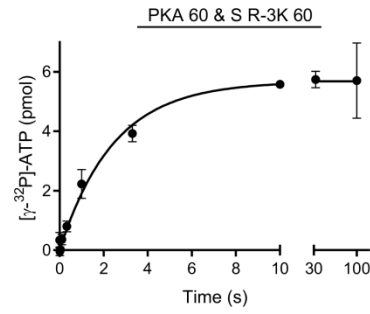

| Best-fit values |         |
|-----------------|---------|
| Y0              | = 0.000 |
| Plateau         | 5.680   |
| K               | 0.4094  |
| Tau             | 2.442   |
| Half-time       | 1.693   |
| Span            | = 5.680 |
| Std. Error      |         |
| Plateau         | 0.1846  |
| K               | 0.05113 |

180

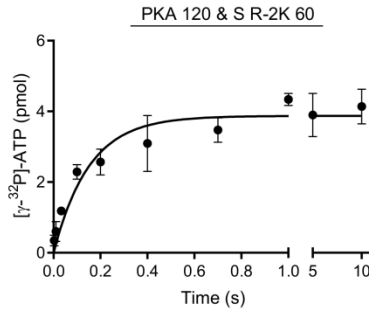

| Best-fit values |         |
|-----------------|---------|
| Y0              | = 0.000 |
| Plateau         | 3.872   |
| K               | 6.625   |
| Tau             | 0.1510  |
| Half-time       | 0.1046  |
| Span            | = 3.872 |
| Std. Error      |         |
| Plateau         | 0.1713  |
| K               | 1.276   |

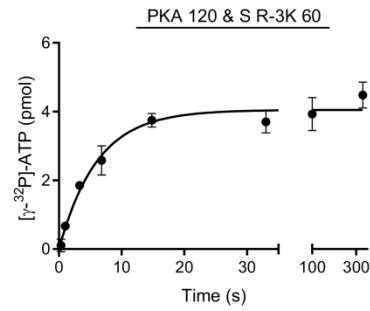

| Best-fit values |         |
|-----------------|---------|
| Y0              | = 0.000 |
| Plateau         | 4.046   |
| K               | 0.1644  |
| Tau             | 6.081   |
| Half-time       | 4.215   |
| Span            | = 4.046 |
| Std. Error      |         |
| Plateau         | 0.1284  |
| K               | 0.02013 |

not linked

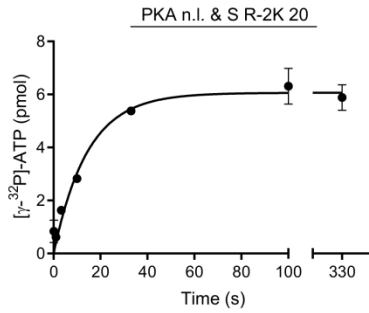

| Best-fit values |         |
|-----------------|---------|
| Y0              | = 0.000 |
| Plateau         | 6.061   |
| K               | 0.06950 |
| Tau             | 14.39   |
| Half-time       | 9.973   |
| Span            | = 6.061 |
| Std. Error      |         |
| Plateau         | 0.2303  |
| K               | 0.01012 |

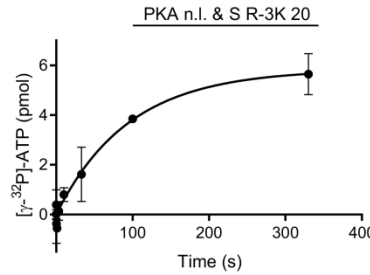

| Best-fit values |          |
|-----------------|----------|
| Y0              | = 0.000  |
| Plateau         | 5.833    |
| K               | 0.01056  |
| Tau             | 94.70    |
| Half-time       | 65.64    |
| Span            | = 5.833  |
| Std. Error      |          |
| Plateau         | 0.4792   |
| K               | 0.002252 |

### PKA & S R-3K

#### 1 mM ATP+ 5 μM PKA & S

60

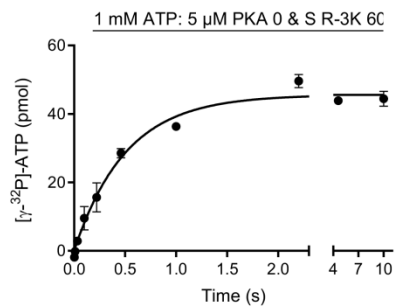

| Best-fit values |         |
|-----------------|---------|
| Y0              | = 0.000 |
| Plateau         | 45.58   |
| K               | 1.972   |
| Tau             | 0.5071  |
| Half-time       | 0.3515  |
| Span            | = 45.58 |
| Std. Error      |         |
| Plateau         | 1.113   |
| K               | 0.1746  |

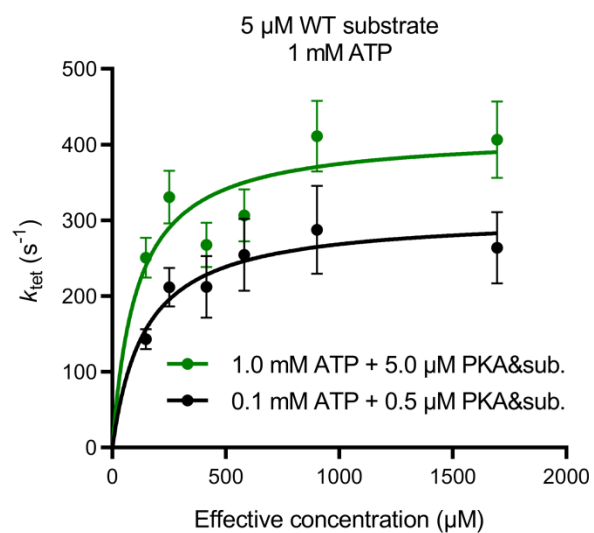

**Fig. S3: ATP dependence of the tethered reaction.** The ATP dependence of the tethered phosphorylation was tested at 1 mM ATP, whereas all other experiments were conducted at 100  $\mu\text{M}$ . The amount of  $[\gamma\text{-}^{32}\text{P}]\text{ATP}$  was already at maximally permitted level, so the protein concentration was also increased 10-fold to preserve the same signal to noise.



## Derivations of rate equations

### *Tethered system*

We consider a catalytical model where product release limits steady-state reaction rates and where phosphorylation and product release are two irreversible steps.

Moreover, we use saturating ATP concentrations and assume  $k_{\text{ATP binding}} \gg k_{\text{cat}}$ . Thus, we define the following states:

- O = open tethered system, bound ATP
- C = closed tethered system, bound ATP
- CP = closed, phosphorylated tethered system, bound ADP
- OP = open tethered system

The tethered system is composed of two interacting partners, and closure of this system is governed by effective concentration,  $C_{\text{eff}}$ :

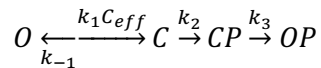

The Law of Mass Action applied to the model leads to the following system of nonlinear reaction equations:

$$\frac{d[O]}{dt} = -k_1 C_{\text{eff}}[O] + k_{-1}[C]$$

$$\frac{d[C]}{dt} = k_1 C_{\text{eff}}[O] - (k_{-1} + k_2)[C]$$

$$\frac{d[CP]}{dt} = k_2[C] - k_3[CP]$$

$$\frac{d[OP]}{dt} = k_3[CP]$$

In single turnover experiments both closed and open phosphorylated products are measured, hence:

$$P = CP + OP$$

$$\frac{d[P]}{dt} = \frac{d[CP]}{dt} + \frac{d[OP]}{dt} = k_2[C]$$

From the conservation law, total concentration of the tethered system is constant:

$$\frac{d[O]}{dt} + \frac{d[C]}{dt} + \frac{d[CP]}{dt} + \frac{d[OP]}{dt} = 0$$

$$[O] + [C] + [CP] + [OP] = [E]_T$$

$$[O] = [E]_T - [C] - [P]$$

Rapid equilibrium assumption for the open/closed complex:

$$\frac{d[O]}{dt} = 0$$

$$k_1 C_{eff} [O] = k_{-1} [C]$$

$$k_1 C_{eff} ([E]_T - [C] - [P]) = k_{-1} [C]$$

$$k_{-1} [C] + k_1 C_{eff} [C] = k_1 C_{eff} [E]_T - k_1 C_{eff} [P]$$

$$[C] = \frac{k_1 C_{eff} [E]_T - k_1 C_{eff} [P]}{k_{-1} + k_1 C_{eff}} = \frac{C_{eff} [E]_T - C_{eff} [P]}{\frac{k_{-1}}{k_1} + C_{eff}}$$

Given  $K_d = \frac{k_{-1}}{k_1}$ :

$$[C] = \frac{C_{eff} [E]_T - C_{eff} [P]}{K_d + C_{eff}}$$

Substituting  $[C]$  into the product formation equation:

$$\frac{d[P]}{dt} = k_2 [C] = k_2 \frac{C_{eff} [E]_T - C_{eff} [P]}{K_d + C_{eff}}$$

Integrate product formation rate:

$$\frac{d[P]}{dt} = -\frac{k_2 C_{eff}}{K_d + C_{eff}} [P] + \frac{k_2 C_{eff} [E]_T}{K_d + C_{eff}}$$

$$\frac{1}{-\frac{k_2 C_{eff}}{K_d + C_{eff}} [P] + \frac{k_2 C_{eff} [E]_T}{K_d + C_{eff}}} d[P] = dt$$

$$\int_0^{[P]} \frac{1}{-\frac{k_2 C_{eff}}{K_d + C_{eff}} [P] + \frac{k_2 C_{eff} [E]_T}{K_d + C_{eff}}} d[P] = \int_0^t dt$$

$$-\frac{K_d + C_{eff}}{k_2 C_{eff}} \ln \left| -\frac{k_2 C_{eff}}{K_d + C_{eff}} [P] + \frac{k_2 C_{eff} [E]_T}{K_d + C_{eff}} \right| + \frac{K_d + C_{eff}}{k_2 C_{eff}} \ln \left| -\frac{k_2 C_{eff}}{K_d + C_{eff}} \cdot 0 + \frac{k_2 C_{eff} [E]_T}{K_d + C_{eff}} \right| = t - 0$$

$$\ln \left| \frac{k_2 C_{eff} ([E]_T - [P])}{K_d + C_{eff}} \right| - \ln \left| \frac{k_2 C_{eff} [E]_T}{K_d + C_{eff}} \right| = - \frac{k_2 C_{eff}}{K_d + C_{eff}} t$$

$$\ln \left| \frac{[E]_T - [P]}{[E]_T} \right| = - \frac{k_2 C_{eff}}{K_d + C_{eff}} t$$

$$\frac{[E]_T - [P]}{[E]_T} = e^{-\frac{k_2 C_{eff}}{K_d + C_{eff}} t}$$

Formation of phosphorylated product is described by the following equation:

$$[P] = [E]_T \left( 1 - e^{-\frac{k_2 C_{eff}}{K_d + C_{eff}} t} \right)$$

Phosphorylation rates in the tethered system obtained from quench flow measurements ( $k_{tet}$ ) are dependent on effective concentration:

$$k_{tet} = \frac{k_2 C_{eff}}{K_d + C_{eff}}$$

### Untethered system

We consider a catalytical model where product release limits steady-state reaction rates and where phosphorylation and product release are two irreversible steps.

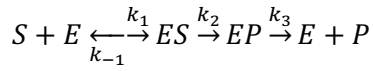

The Law of Mass Action applied to the model leads to the following system of nonlinear reaction equations:

$$\frac{d[S]}{dt} = -k_1[S][E] + k_{-1}[ES]$$

$$\frac{d[E]}{dt} = -k_1[S][E] + k_{-1}[ES] + k_3[EP]$$

$$\frac{d[ES]}{dt} = k_1[S][E] - (k_{-1} + k_2)[ES]$$

$$\frac{d[EP]}{dt} = k_2[ES] - k_3[EP]$$

$$\frac{d[P]}{dt} = k_3[EP]$$

From the conservation law for the enzyme, total enzyme concentration is constant:

$$\frac{d[E]}{dt} + \frac{d[ES]}{dt} + \frac{d[EP]}{dt} = 0$$

$$[E] + [ES] + [EP] = [E]_0$$

$$[E] = [E]_0 - [ES] - [EP]$$

Rapid equilibrium assumption:

$$\frac{d[S]}{dt} = 0$$

$$k_1[S][E] = k_{-1}[ES]$$

$$k_1[S]([E]_0 - [ES] - [EP]) = k_{-1}[ES]$$

$$k_1[S][E]_0 - k_1[S][EP] = k_{-1}[ES] + k_1[S][ES]$$

$$[ES] = \frac{k_1[S][E]_0 - k_1[S][EP]}{k_1[S] + k_{-1}}$$

Quasi-steady-state approximation of the  $[EP]$  complex:

$$\frac{d[EP]}{dt} = 0$$

$$k_2[ES] - k_3[EP] = 0$$

$$\frac{k_3[EP]}{k_2} = [ES]$$

$$\frac{k_3[EP]}{k_2} = \frac{k_1[S][E]_0 - k_1[S][EP]}{k_1[S] + k_{-1}}$$

$$k_1k_3[S][EP] + k_{-1}k_3[EP] = k_1k_2[S][E]_0 - k_1k_2[S][EP]$$

$$[EP]([S]k_1(k_2 + k_3) + k_{-1}k_3) = k_1k_2[S][E]_0$$

$$[EP] = \frac{k_1k_2[S][E]_0}{[S]k_1(k_2 + k_3) + k_{-1}k_3}$$

$$[EP] = \frac{\frac{k_2[S][E]_0}{k_2 + k_3}}{[S] + \frac{k_{-1}k_3}{k_1(k_2 + k_3)}}$$

Given  $K_d = \frac{k_{-1}}{k_1}$ :

$$[EP] = \frac{\frac{k_2[S][E]_0}{k_2 + k_3}}{[S] + K_d \frac{k_3}{k_2 + k_3}}$$

Finally, substituting  $[EP]$  into the product formation equation:

$$\frac{d[P]}{dt} = k_3[EP] = \frac{\frac{k_2k_3}{k_2 + k_3} [S][E]_0}{[S] + K_d \frac{k_3}{k_2 + k_3}}$$

Hence:

$$k_{cat} = \frac{k_2k_3}{k_2 + k_3}$$

$$K_M = K_d \frac{k_3}{k_2 + k_3}$$
